# Supplementary material
Source: PubMed Central journal article supplement (PMC3190688)
Supplement: supp_M111.258160_jbc.M111.258160-1.pdf [file supp_M111.258160_jbc.M111.258160-1.pdf]

## Supplemental Material (Denda et al.)

### Supplemental Table 1

**Number of offspring derived from  $X^{NrK}Y \times XX^{NrK}$  matings at 18.5-19.5 dpc and at weaning**

|              |                  | XY        | $X^{NrK}Y$ | $XX^{NrK}$ | $X^{NrK}X^{NrK}$ |
|--------------|------------------|-----------|------------|------------|------------------|
| before birth | 18.5 or 19.5 dpc | 68 (26%)  | 73 (28%)   | 60 (23%)   | 56 (22%)         |
| after birth  | 19.5 dpc         | 7 (19%)   | 10 (28%)   | 8 (22%)    | 11 (31%)         |
|              | at weaning       | 109 (46%) | 16 ( 7%)   | 96 (40%)   | 19 ( 8%)         |

## Supplemental Fig. 1

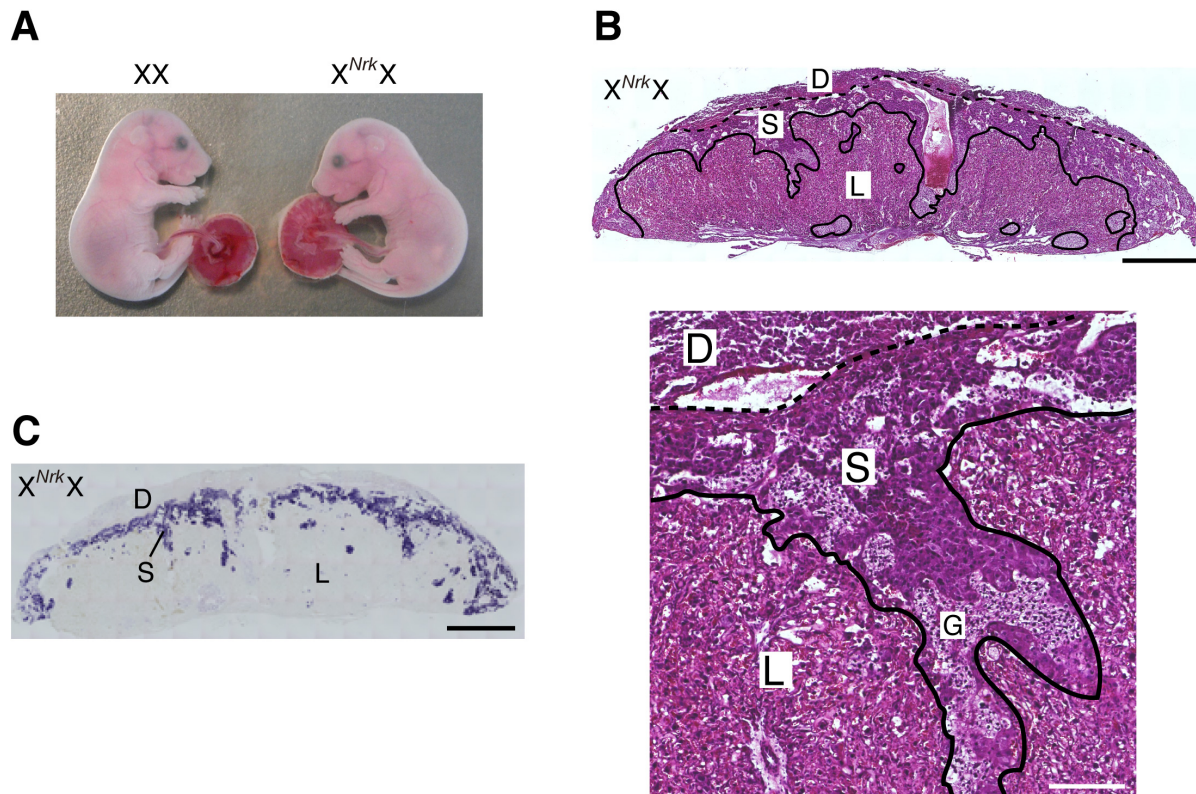**Histology of  $X^{Nr1}X$  placenta**

A. WT (XX) and  $X^{Nr1}X$  fetuses and placentas at 18.5 dpc. B. H&E staining of  $X^{Nr1}X$  placenta at 18.5 dpc at low (top) and high (bottom) magnification. D, decidual layer; S, spongiotrophoblast layer; L, labyrinth layer; G, glycogen cells in the spongiotrophoblast layer. The three layers are divided by broken and solid lines. C. *In situ* hybridization analysis of *Tpbp-α* mRNA in  $X^{Nr1}X$  placenta at 18.5 dpc. Bars, 1 mm (B, top; C) and 200  $\mu\text{m}$  (B, bottom).
